# Supplementary material for: Photomechanical Structures Based on Porous Alumina Templates Filled with 9-Methylanthracene Nanowires
Source: MDPI journal article supplement (doi:10.3390/cryst12060808), 2022-06-08
Supplement: s1 [file s1]

Archive with 1 entries (1 files):
- crystals-1745124-supplementary.pdf
